# Supplementary material for: Boosting photocatalytic hydrogen production of CdS/BiVO4 nanoplates by transferring in-plane plasmon resonant energy of gold nanoparticles
Source: Royal Society of Chemistry journal article supplement (doi:10.1039/d3cy01785k), 2024-01-01
Supplement: d3cy01785k1.pdf [file d3cy01785k1.pdf]

# Supporting Information

## Boosting photocatalytic hydrogen production of CdS/BiVO<sub>4</sub> nanoplates by transferring in-plane plasmon resonant energy of gold nanoparticles

Ming-Han Liu<sup>ab†\*</sup> and Yukina Takahashi<sup>abc\*</sup>

<sup>a</sup> International Institute for Carbon-Neutral Energy Research (WPI-I2CNER), Kyushu University, Fukuoka, 819-0395, Japan

<sup>b</sup> Mitsui Chemicals, Inc. – Carbon Neutral Research Center (MCI-CNRC), Kyushu University, Fukuoka, 819-0395, Japan

<sup>c</sup> Center for Future Chemistry, Kyushu University, Fukuoka, 819-0395, Japan.

<sup>†</sup> Present address: Department of Applied Chemistry, National Chiayi University, Chiayi City, 600355, Taiwan

### Experimental Section

**Chemicals.** Sodium sulfite (Na<sub>2</sub>SO<sub>3</sub>, Wako), Sodium sulfide nonahydrate (Na<sub>2</sub>S·9H<sub>2</sub>O, 95%, Kanto), cadmium acetate dihydrate ((CH<sub>3</sub>COO)<sub>2</sub>Cd·2H<sub>2</sub>O, 99.9%, Wako), bismuth nitrate pentahydrate (Bi(NO<sub>3</sub>)<sub>3</sub>·5H<sub>2</sub>O, 99.99%, Wako), ammonium vanadate(V) (NH<sub>4</sub>VO<sub>3</sub>, 99.9%, Wako), nitric acid (HNO<sub>3</sub>, 67%, TCI), oleic acid (OA, tech. grade 90%, Sigma-Aldrich), oleylamine (OLAM, 90%, Sigma-Aldrich), 1-octadecene (ODE, 90%, Aldrich), (3-Aminopropyl)trimethoxysilane (APTMS, 97%, Sigma-Aldrich), and 3-mercaptopropionic acid (MPA, 99.0%, Sigma-Aldrich) were used as received without further purification.

**Preparation of BiVO<sub>4</sub> Nanoplates.** Bismuth vanadate (BiVO<sub>4</sub>) nanoplates were prepared according to the previous literature [1] with slight modification. 0.5 mmol of Bi(NO<sub>3</sub>)<sub>3</sub>·5H<sub>2</sub>O was added to 12 mL of ODE solution containing 1 mL of OLAM and 1 mL of OA in a 100 mL three-neck flask, followed by degassing at 110 °C for 15 min. Next, the solution was heated up and kept stirring at 170 °C for 5 min for complete dissolution, followed by cooling down to 140 °C naturally. Subsequently, 1 mmol of NH<sub>4</sub>VO<sub>3</sub> in 12 mL of 11% HNO<sub>3</sub> aqueous solution was freshly prepared and injected to the above solution. The temperature of solution was kept at 100 °C for 20 min. The resulting BiVO<sub>4</sub> nanoplates were washed and purified with 1:1 hexane/ethanol solution by centrifugation for further use and characterization.

**Preparation of Water Dispersible BiVO<sub>4</sub> Nanoplates.** The OLAM/OA molecules on BiVO<sub>4</sub> nanoplates were replaced by water-soluble MPA molecules under alkaline condition via ligand exchange method. Briefly, the collected BiVO<sub>4</sub> nanoplates were dispersed in 2 mL of 1:1 hexane/CHCl<sub>3</sub>, followed by the addition of 1 mL of MPA solution and 1 mL of 0.1 M NaOH solution. The solution was under vigorous stirring for 30 min. The nanoplates were then collected and washed several time with ethanol/acetone by centrifugation. The obtained nanoparticles were dried in a vacuum for further photocatalytic reaction.

**Preparation of Au-decorated Nanoplates (Au on BiVO<sub>4</sub>).** Gold nanoparticles were deposited on the basal planes of BiVO<sub>4</sub> nanoparticles through photo-deposition. 300  $\mu$ L of 1 wt% HAuCl<sub>4</sub> solution was added dropwise to a solution with pH=10 containing a certain amount of water dispersible BiVO<sub>4</sub> sample. Subsequently, the solution was exposed to the illumination by 300 W Xe lamp with 390 nm long-pass filter for 10 min. The resulting Au-deposited BiVO<sub>4</sub> nanoparticles were washed with water/ethanol and collected by centrifugation.

**CdS Deposition.** Cadmium sulfide (CdS) nanoparticles were deposited on BiVO<sub>4</sub> nanoplates through chemical bath deposition. [2] CdS deposition solution was freshly prepared by dissolving 0.03 mmol of cadmium acetate dihydrate in 3 mL solution containing 0.06 mmol of thiourea, followed by steady stirring for 90 min at room temperature. Subsequently, the solution was added dropwise to 100 mL alkaline solution with pH=10 containing a certain amount of water dispersible BiVO<sub>4</sub> sample and the reaction was incubated at 90 °C for 4.5 h. The resulting nanoparticles were washed with water/ethanol and collected by centrifugation for further use.

**Thin Silica Coating.** A certain amount of water-dispersible Au on BiVO<sub>4</sub> nanoplates was dispersed into 30 mL of a basic solution with pH value equal to ca. 9-10. After that, 200  $\mu$ L of fresh 1% APTMS in ethanol solution was added dropwise to the above solution for 1 h of reaction at room temperature under steady stirring, followed by thermal treatment at 60 °C for 1 h. The obtained SiO<sub>2</sub>-capped Au on BiVO<sub>4</sub> nanoplates were washed with a mixture of deionized water and ethanol by centrifugation for further use.

**Photocatalytic Hydrogen Evolution.** Photocatalytic experiments were performed with a Pyrex glass reactor (wavelength of transmitted light > 300 nm) coupled with a closed-circulation system. ca. 3 mg of CdS/BiVO<sub>4</sub> photocatalysts was dispersed in 80 mL of solution containing 0.8 mmole of Na<sub>2</sub>SO<sub>3</sub>, 0.8 mmole of Na<sub>2</sub>S and 60 μL of 5 mM H<sub>2</sub>PtCl<sub>6</sub> solution (ca. 2 wt% relative to photocatalysts). A 300 W Xe lamp (R300-3J, Cermax, Excelitas Technology) was used as the irradiation light source. The reactor temperature was controlled at around 20 °C through flowing water inside an aluminium jacket, followed by side illumination. The evolution of hydrogen gas was analyzed by using a gas chromatograph (Agilent Tech. 7890A) equipped with a thermal conductivity detector.

**Characterization.** The crystal structure of each sample was investigated using X-ray powder diffraction (Rigaku SmartLab 9kW AMK) with Cu K $\alpha$  radiation ( $\lambda = 1.54186$  Å) under 200 mA and 45 kV. Lattice fringes of nanoparticles were examined using scanning transmission electron microscope equipped with energy-dispersive X-ray spectroscopy (EDS) operating at 200 kV (JEOL, JEM-ARM200F). Morphology, size and elemental analysis of nanoparticles were examined using scanning electron microscope equipped with energy-dispersive X-ray spectroscopy (Hitachi, SU8000 and JEOL, JSM-7900F). Diffuse reflectance spectroscopy (DRS) measurements were carried out on UV-Vis-NIR spectrometer (Shimadzu, UV-3600). Photoluminescence (PL) spectra of photocatalysts were measured on fluorescence spectrometer at an excitation wavelength of 280 nm. (Shimadzu, RF-5300PC). Time-resolved photoluminescence (TRPL) measurement for each photocatalyst was carried out on a C11367-02 HAMAMATSU Quantaaurus-Tau at an excitation wavelength of 280 nm. The PL decay fitting of TRPL spectra were carried out with a bi-exponential function, i.e.,  $F(t)=A_0+A_1\exp\left(\frac{-t}{\tau_1}\right)+A_2\exp\left(\frac{-t}{\tau_2}\right)$ .

## References

- [1] Dong, C.; Lu, S.; Yao, S.; Ge, R.; Wang, Z.; Wang, Z.; An, P.; Liu, Y.; Yang, B.; Zhang, H., Colloidal Synthesis of Ultrathin Monoclinic BiVO<sub>4</sub> Nanosheets for Z-Scheme Overall Water Splitting under Visible Light. *ACS Catal.* **2018**, *8*, 8649-8658.

- [2] Yu, Z. B.; Xie, Y. P.; Liu, G.; Lu, G. Q.; Ma, X. L.; Cheng, H.-M., Self-assembled CdS/Au/ZnO Heterostructure Induced by Surface Polar Charges for Efficient Photocatalytic Hydrogen Evolution. *J. Mater. Chem. A* **2013**, *1*, 2773-2776.

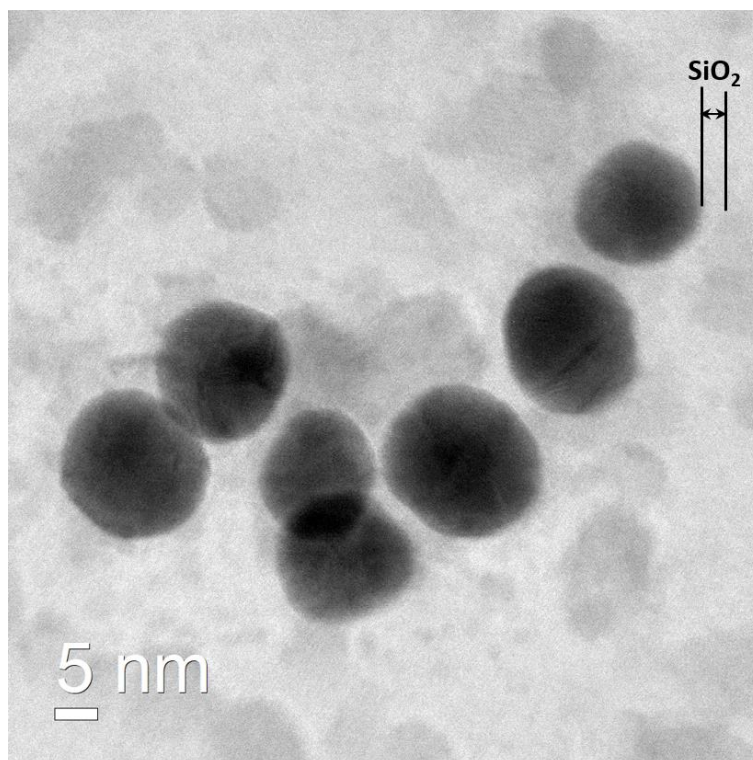

**Fig. S1** TEM image of CdS/SiO<sub>2</sub>-capped Au on BiVO<sub>4</sub> photocatalyst. (The label inside indicates the location and thickness of SiO<sub>2</sub> modification with MPTMS molecules.)

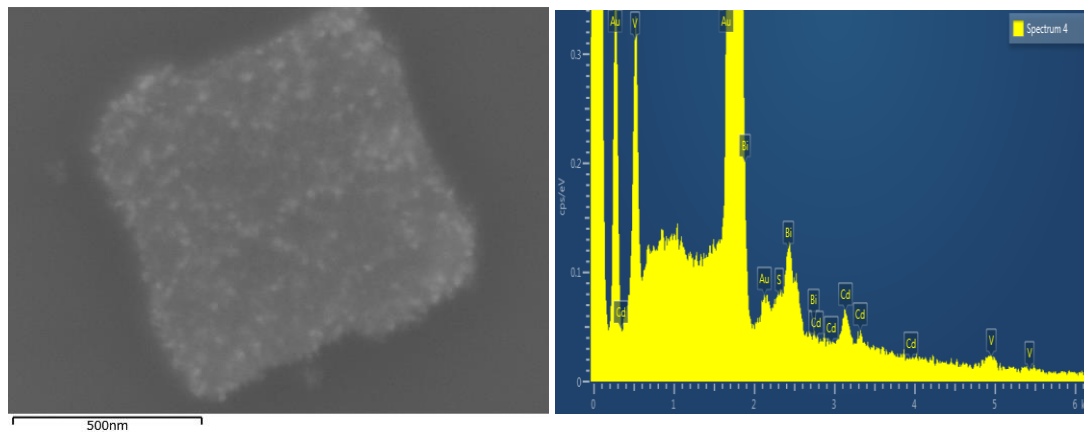

| Element       | Line Type | Wt%    | Wt% Sigma | Atomic % | Standard Label | Factory Standard |
|---------------|-----------|--------|-----------|----------|----------------|------------------|
| S             | K series  | 5.01   | 1.05      | 16.87    | FeS2           | Yes              |
| V             | K series  | 14.21  | 2.67      | 30.10    | V              | Yes              |
| Cd            | L series  | 24.27  | 2.52      | 23.30    | Cd             | Yes              |
| Au            | M series  | 17.01  | 2.52      | 9.32     | Au             | Yes              |
| Bi            | M series  | 39.50  | 3.47      | 20.40    | Bi             | Yes              |
| <b>Total:</b> |           | 100.00 |           | 100.00   |                |                  |

**Fig. S2** Chemical composition analysis over single CdS/Au on BiVO<sub>4</sub> photocatalyst using by SEM equipped with energy dispersive x-ray spectrometer. The loading amounts of CdS and Au over BiVO<sub>4</sub> nanoplate are ca. 22 wt% and 10 wt%, respectively. Atomic percentage of V and Cd elements are used for the calculation of BiVO<sub>4</sub> and CdS amounts, respectively.
